# Supplementary material for: Aryl Hydrocarbon Receptor (AhR) Limits the Inflammatory Responses in Human Lung Adenocarcinoma A549 Cells via Interference with NF-κB Signaling
Source: MDPI journal article supplement (doi:10.3390/cells11040707), 2022-02-17
Supplement: s1 [file s1]

# Aryl Hydrocarbon Receptor (AhR) Limits the Inflammatory Responses in Human Lung Adenocarcinoma A549 Cells via Interference with NF- $\kappa$ B Signaling

Gerardo Vázquez-Gómez, Martina Karasová, Zuzana Tylichová, Markéta Kabátková, Aleš Hampl, Jason Matthews, Jiří Neča, Miroslav Ciganeck, Miroslav Machala and Jan Vondráček

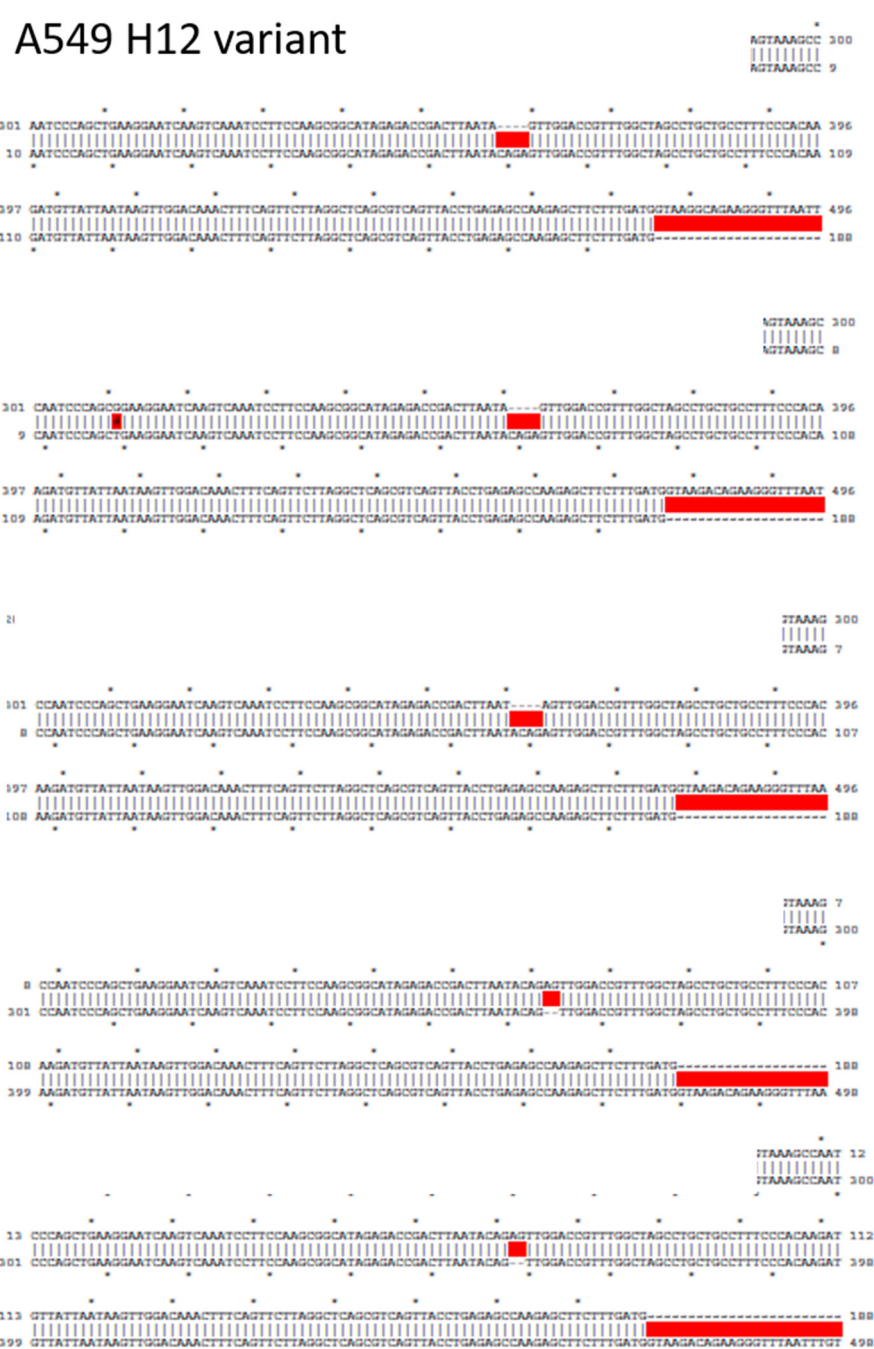

## A549 D3 variant

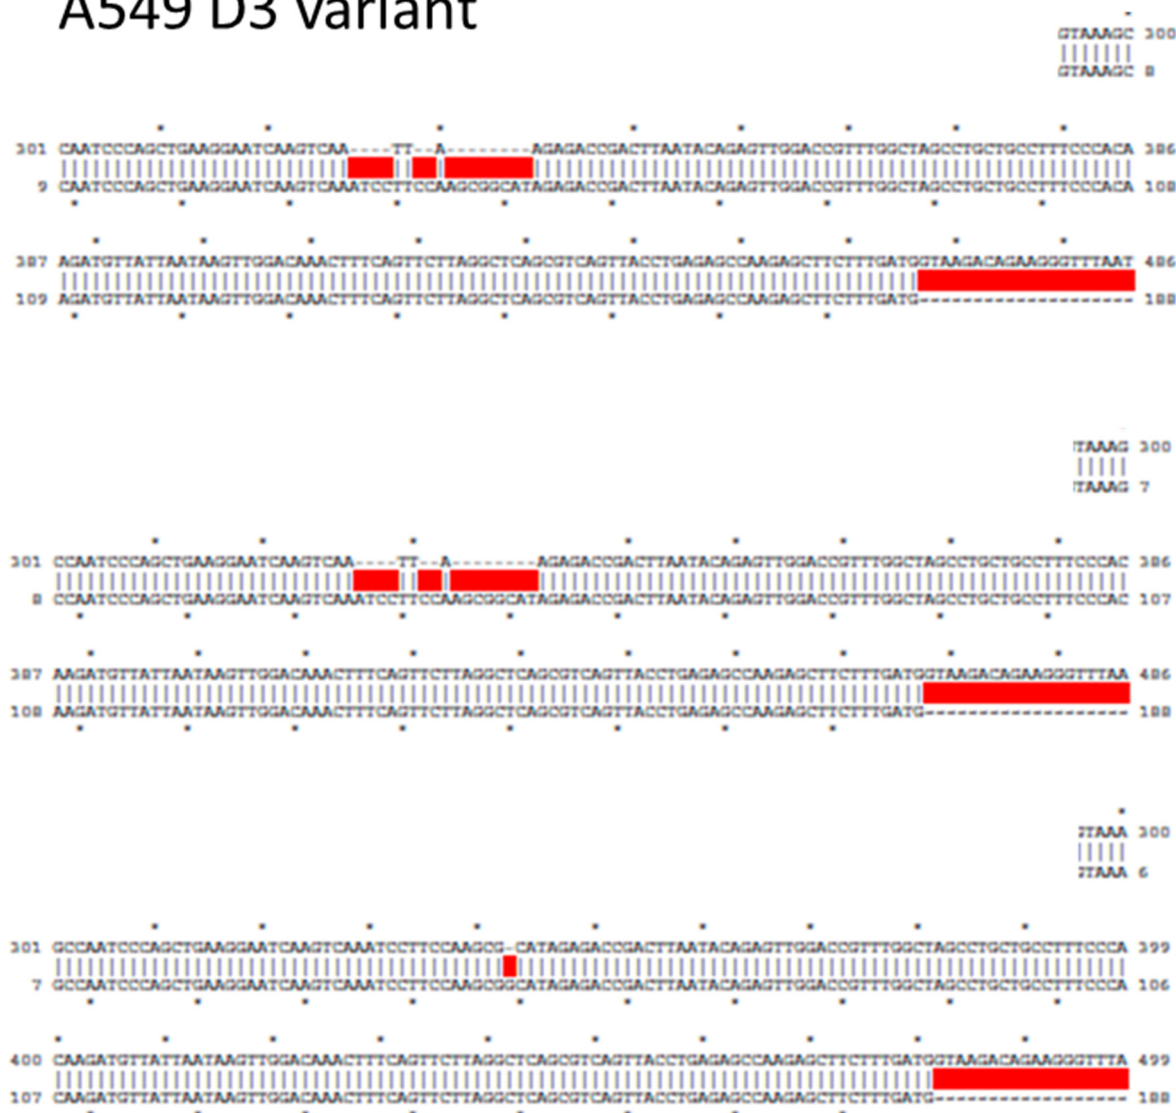

**Figure S1.** Sequencing data shown as alignment of tested sequences bearing mutations (deletions) and reference sequence AhR gene (exon 2). Clone H12 contains deletions CAGA and AG, both causing frameshift in reading frame. Clone D3 contains longer deletion ATCC-CC-AGCGGCAT and 1 nt deletion of G. Presence of two different mutations confirms bi-allelic knockout of AhR gene.

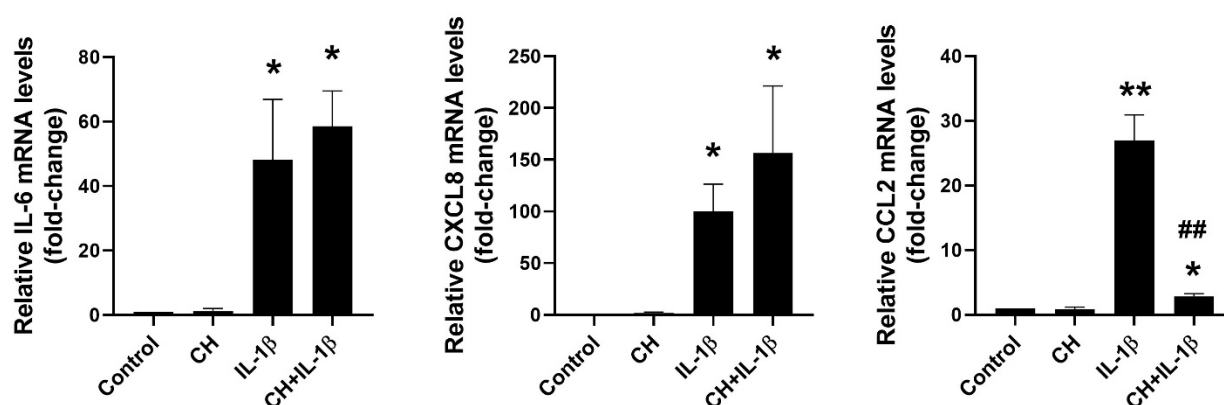

**Figure S2.** Effects of AhR antagonist CH-223191 on induction of IL-6, IL-8 and CCL2 mRNAs induction by IL-1 $\beta$  in A549 cells. A549 AhR WT cells were exposed to IL-1 $\beta$  (10 ng/mL), or its diluent (negative control) in presence or absence of CH-223191 (10  $\mu$ M; added 1 h before the treatment) for 24 h. Following the incubation, total RNA was isolated and IL-6, CXCL8 and CCL2 mRNAs were quantified by RT-qPCR. The data represent means + SD of three independent experiments. \* and \*\* denote significant difference ( $P < 0.05$  or  $P < 0.01$ , respectively) between the IL-1 $\beta$ -treated group and the respective control group. ## Denotes significant difference ( $P < 0.01$ ) between the IL-1 $\beta$ -treated cells and the cells treated simultaneously with IL-1 $\beta$  and CH-223191.

**Table S1.** Primer and probe sequences used for RT-qPCR.

| Gene/accession no.             | Primer/probe | Primer and probe sequences                                                |
|--------------------------------|--------------|---------------------------------------------------------------------------|
| CYP1A1<br>NM_000499.3          | Fw.          | 5'-CACCATCCCCACAGCAC-3'                                                   |
|                                | Rev.         | 5'-TTACAAAGACACAACGCCCC-3'                                                |
|                                | Probe        | 5'-CAAGTTTGAAAGGCTTTTACATCCCC-3'                                          |
| IL-6<br>NM_000600.4            | Fw.          | 5'-GATGAGTACAAAAGTCCTGATCC-3'                                             |
|                                | Rev.         | 5'-CTGCAGCCACTGGTCTGT-3'                                                  |
|                                | Probe        | UPL # 40                                                                  |
| CXCL8<br>NM_000584.38          | Fw.          | 5'-AGACAGCAGAGCACACAAGC-3'                                                |
|                                | Rev.         | 5'-ATGGTTCCTTCCGGTGGT-3'                                                  |
|                                | Probe        | UPL #72                                                                   |
| CCL2<br>NM_002982.3            | Fw.          | 5'-AGTCTCTGCCGCCCTTCT-3'                                                  |
|                                | Rev.         | 5'-GTGACTGGGGCATTGATTG-3'                                                 |
|                                | Probe        | UPL #40                                                                   |
| TNF<br>NM_000594.3             | Fw           | 5'-CAGCCTCTTCTCCTTCCTGAT-3'                                               |
|                                | Rev.         | 5'-GCCAGAGGGCTGATTAGAGA-3'                                                |
|                                | Probe        | UPL #29                                                                   |
| mPGES-1<br>NM_004878.4         | Fw.          | 5'-CCCTGAGTCCTGGTTTCCT-3'                                                 |
|                                | Rev.         | 5'-CACACACACAGGCCCACT-3'                                                  |
|                                | Probe        | UPL# 40                                                                   |
| TBP (ref. gene)<br>NM_003194.4 | Fw.          | 5'-GAACATCATGGATCAGAACAACA-3'                                             |
|                                | Rev.         | 5'-ATAGGGATTCCGGGAGTCAT-3'                                                |
|                                | Probe        | UPL #87                                                                   |
| COX-2<br>NM_000963.2           | Fw.          | 5'-CTTCACGCATCAGTTTTTCAAG-3'                                              |
|                                | Rev.         | 5'-TCACCGTAAATATGATTTAAGTCCAC-3'                                          |
|                                | Probe        | UPL #23                                                                   |
| TIPARP<br>NM_001184717         | Fw.          | 5'-GGAAATTCTTCTGTAGGGACCA-3'                                              |
|                                | Rev.         | 5'-AATCAATCGAATGACAGACTCG-3'                                              |
|                                | Probe        | UPL #58                                                                   |
| IL-1B<br>NM-000576.2           |              | TaqMan® Assay Probe ID: Hs01555410_m1.<br>Thermo Fisher, Cat. No. 4331182 |

**Table S2.** Eicosanoid quantification in A549 WT and AhR KO cells treated with IL-1 $\beta$ . Significant differences between AhR WT cells and AhR KO cells are highlighted in bold.

| Eicosanoid                        | WT           |      | AhR KO      |      | <i>p</i> -value | WT           |       | AhR KO        |        | <i>p</i> -value |
|-----------------------------------|--------------|------|-------------|------|-----------------|--------------|-------|---------------|--------|-----------------|
|                                   | Control      |      | Control     |      |                 | IL-1β        |       | IL-1β         |        |                 |
|                                   | Mean         | SD   | Mean        | SD   |                 | Mean         | SD    | Mean          | SD     |                 |
| Arachidonic acid <sup>a</sup>     | 34.2         | 8.4  | 21.1        | 3.3  | 0.2313          | 43.5         | 11.9  | 26.5          | 5.1    | 0.0878          |
| PGE <sub>2</sub>                  | 11.1         | 4.2  | 13.2        | 6.1  | >0.9999         | <b>811.7</b> | 379.5 | <b>5820.8</b> | 1370.4 | <0.0001         |
| PGA <sub>2</sub>                  | 8.9          | 4.4  | 6.2         | 1.0  | >0.9999         | <b>171.5</b> | 77.6  | <b>1100.5</b> | 278.7  | <0.0001         |
| PGD <sub>2</sub>                  | 18.1         | 5.4  | 17.7        | 3.3  | >0.9999         | <b>59.5</b>  | 13.6  | <b>310.3</b>  | 96.0   | 0.0002          |
| PGJ <sub>2</sub>                  | 0.9          | 0.3  | 0.8         | 0.1  | >0.9999         | <b>6.1</b>   | 2.3   | <b>32.9</b>   | 14.8   | 0.0043          |
| PGF <sub>2α</sub>                 | 17.4         | 6.7  | 29.9        | 15.0 | >0.9999         | <b>630.9</b> | 315.1 | <b>5434.2</b> | 1880.9 | 0.0002          |
| 8-Iso-PGF <sub>2α</sub>           | 6.4          | 1.7  | 8.7         | 2.0  | >0.9999         | <b>21.2</b>  | 10.8  | <b>114.8</b>  | 31.6   | 0.0001          |
| PGF <sub>2β</sub>                 | 32.7         | 17.6 | 19.0        | 5.3  | 0.9972          | 345.5        | 155.8 | 178.3         | 68.9   | 0.1318          |
| 15-keto-PGE <sub>2</sub>          | 2.9          | 0.6  | 2.0         | 0.6  | 0.9618          | 4.0          | 1.8   | 7.2           | 4.2    | 0.3803          |
| 13,14-DH-15-keto-PGE <sub>2</sub> | 9.7          | 4.4  | 4.3         | 1.7  | >0.9999         | 775.8        | 360.4 | 975.2         | 273.8  | 0.8218          |
| 13,14-DH-15-keto-PGD <sub>2</sub> | 1.3          | 0.1  | 1.5         | 0.2  | 0.9947          | 8.1          | 1.6   | 8.0           | 2.2    | 0.9991          |
| 20-HETE                           | 25.5         | 9.8  | 22.1        | 9.7  | 0.9856          | 35.3         | 18.8  | 25.2          | 7.6    | 0.7493          |
| 13-HODE                           | 57.6         | 14.0 | 36.7        | 12.0 | 0.3365          | <b>122.0</b> | 17.8  | <b>41.5</b>   | 13.7   | 0.0001          |
| 9-HODE                            | 32.0         | 5.8  | 19.9        | 13.1 | 0.296           | 34.1         | 5.7   | 22.3          | 4.0    | 0.315           |
| 15-HETE                           | 18.3         | 5.6  | 7.2         | 2.2  | 0.0806          | 16.8         | 7.6   | 8.1           | 2.8    | 0.1999          |
| 11-HETE                           | 140.1        | 63.1 | 31.3        | 7.6  | 0.0898          | <b>247.8</b> | 71.9  | <b>87.9</b>   | 33.2   | 0.0106          |
| 8-HETE                            | <b>31.7</b>  | 12.8 | <b>4.8</b>  | 2.5  | 0.0052          | 20.7         | 7.3   | 6.5           | 3.5    | 0.164           |
| 12-HETE                           | <b>119.6</b> | 13.9 | <b>11.5</b> | 3.6  | <0.0001         | <b>114.3</b> | 20.2  | <b>14.1</b>   | 7.0    | <0.0001         |
| 9-HETE                            | 4.5          | 3.1  | 1.9         | 0.3  | 0.4615          | 4.4          | 3.0   | 2.0           | 0.5    | 0.5377          |
| 5-HETE                            | 17.2         | 5.7  | 9.3         | 4.1  | 0.1675          | 15.3         | 4.6   | 9.1           | 2.3    | 0.342           |

<sup>a</sup> The levels of AA are shown in ng/ml. All other values are in pg/ml of cell culture medium.
